# Supplementary material for: A Full-Length Reference Floral Transcriptome ofBoehmeria tricuspisProvides Insights into Apomeiosis and Polyploidy
Source: Hindawi journal article supplement (doi:10.1155/2019/4025747), 2019-12-17
Supplement: f1 [file 4025747.f1.pdf]

Table S1: Calendar of the reproductive development of *B. tricuspis*.

| Cytotype  | Stage <sup>a</sup> | Ovule development                                                   | Femal glomerule diameter [mm] | Browning rate of exerted stigma [%] |
|-----------|--------------------|---------------------------------------------------------------------|-------------------------------|-------------------------------------|
| Apomictic | I                  | MMC formed                                                          | 1.5                           | ≤20                                 |
|           | II                 | Functional megaspores formed (apomeiosis)                           | 1.8                           | 21-40                               |
|           | III                | Mature embryo sac formation                                         | 2.5                           | 41-90                               |
|           | IV                 | Mature embryo formation                                             | 3.0                           | ≥91                                 |
| Sexual    | I                  | MMC formed                                                          | 1.6                           | ≤30                                 |
|           | II                 | Functional megaspores formed (tetrad to degeneration of megaspores) | 1.9                           | 31-50                               |
|           | III                | Mature embryo sac formation                                         | 2.4                           | 51-90                               |
|           | IV                 | Mature embryo formation                                             | 2.9                           | ≥91                                 |

<sup>a</sup> according to Q.T. et al. (2017)

Table S2: List of primers sequences used for real time PCR analysis.

| Gene ID          | Forward Primer              | Reverse Primer         |
|------------------|-----------------------------|------------------------|
| Unigene042048_01 | ACAAGCCAATCCCACCAATC        | TTCTCTTCCTTGCCAGTGTACC |
| Unigene001412_01 | GAAGCTCATGAGGAAGTTCTG<br>TG | AATGGTCTTGGGCTTCTTGG   |
| Unigene004190_01 | TCGGAAGGAGATGGACTTTT<br>GG  | ACCGTCCATCTCGTACATCTTG |
| Unigene005022_01 | CTAGAATTGCCGTAGGAAGT        | CCGGCGAAGACGAAGATAA    |
| Unigene010575_01 | CGTTGGCTTCTTGCTTCTCTT<br>C  | AGTGGAAACCAACGCTCTTG   |
| Unigene005530_01 | AGTGAGTGAGTGAGCATGGC        | CTGTAGCCCTCGACGAATCC   |
| Unigene033992_01 | ATGCTGCGAGTTCAAAACCG        | TGTGGTGCATGTATCTGTGC   |
| Unigene004215_02 | AGATTGGTTGCTGCCGAATC        | ACAGTCTGCACCGCAAATC    |
| Unigene016354_01 | GCATGTCTCATCATCACG          | AGCATCTCTTCTCAGTCTCT   |
| Unigene025939_01 | TGATCATGGCCATTCGATCG        | CAAAAACATGCACGCCCATG   |
| Unigene010179    | GGAGCTGGAGGTAGGATG          | TGATCTGGCTTAGGGTG      |

|               |                       |                   |
|---------------|-----------------------|-------------------|
| _01           |                       | AAT               |
| Unigene024393 | G TTCCTCGCAACACACACAC | AGAACGTCCACGAAGC  |
| _01           |                       | CATT              |
| Unigene006965 | TTCTCTCCATTGCTTCTACG  | ACAAATCTTCTCATCTG |
| _01           |                       | CCG               |
| Unigene005553 | CATGCTTCTGCTCCTACCTAA | GCAGAGGCGACTTTCT  |
| _01           |                       | TG                |
| <i>EF1α</i>   | ATCAAGCCCACTAAGCCCTT  | TTCTCTCTGGCAGTGAC |
|               |                       | CTC               |

Table S3: PacBio SMRT sequencing information of the flowers of *B. tricuspis*.

| Cell Name | Number of Subreads | Subreads [nt] | Mean Length of Subreads [nt] | Number of CCS Reads | CCS [nt]  | Mean CCS Read Length [nt] |
|-----------|--------------------|---------------|------------------------------|---------------------|-----------|---------------------------|
| BT-F1     | 6759718            | 10079763373   | 1491                         | 501296              | 932016199 | 1859                      |
| BT-F2     | 3927679            | 5977785708    | 1521                         | 311221              | 576273329 | 1851                      |

Table S4: Summary of *B. tricuspis* IsoSeq.

| Number of Consensus Reads | Number of Five Prime Reads | Number of Three Prime Reads | Number of Poly-A Reads | Number of Non-full-length Reads | Number of Full-length Reads | Number of Full-length non-chimeric Reads | Mean Full-length Non-chimeric Read Length [nt] |
|---------------------------|----------------------------|-----------------------------|------------------------|---------------------------------|-----------------------------|------------------------------------------|------------------------------------------------|
| 812517                    | 649739                     | 640935                      | 631391                 | 235773                          | 561190                      | 538010                                   | 1781                                           |

Table S5: Functional annotation of protein-coding transcripts of *B. tricuspis*.

| Total | NR    | Swissport | KEGG  | KOG   | Pfam  | Annotated | Without Annotation |
|-------|-------|-----------|-------|-------|-------|-----------|--------------------|
| 50787 | 48950 | 34553     | 32141 | 49384 | 44597 | 49739     | 1047               |

Table S6: Illumina sequencing information of samples at the functional megaspore-formed stage of the four cytotypes.

| Sample | Raw Bases | Raw Reads | Clean Bases [%] | Clean Reads [%] | Clean Q20 [%] |
|--------|-----------|-----------|-----------------|-----------------|---------------|
|--------|-----------|-----------|-----------------|-----------------|---------------|

|          |                |            |                            |                        |                            |
|----------|----------------|------------|----------------------------|------------------------|----------------------------|
| JG1-II-1 | 7,926,329,700  | 52,842,198 | 7,914,718,954<br>(99.85%)  | 52,792,902<br>(99.91%) | 7,597,262,480<br>(95.99%)  |
| JG1-II-2 | 7,787,846,400  | 51,918,976 | 7,776,844,314<br>(99.86%)  | 51,870,282<br>(99.91%) | 7,461,983,503<br>(95.95%)  |
| JG1-II-3 | 7,944,276,600  | 52,961,844 | 7,932,618,602<br>(99.85%)  | 52,916,390<br>(99.91%) | 7,610,075,065<br>(95.93%)  |
| JG2-II-1 | 7,473,756,300  | 49,825,042 | 7,337,346,518<br>(98.17%)  | 48,956,560<br>(98.26%) | 7,077,062,487<br>(96.45%)  |
| JG2-II-2 | 8,308,687,500  | 55,391,250 | 8,183,236,174<br>(98.49%)  | 54,572,418<br>(98.52%) | 7,940,420,808<br>(97.03%)  |
| JG2-II-3 | 9,534,023,700  | 63,560,158 | 9,376,464,260<br>(98.35%)  | 62,540,714<br>(98.40%) | 9,058,958,222<br>(96.61%)  |
| ZJJ-II-1 | 10,796,442,900 | 71,976,286 | 10,787,279,944<br>(99.92%) | 71,942,154<br>(99.95%) | 10,546,917,977<br>(97.77%) |
| ZJJ-II-2 | 10,848,476,700 | 72,323,178 | 10,838,625,166<br>(99.91%) | 72,286,118<br>(99.95%) | 10,591,391,691<br>(97.72%) |
| ZJJ-II-3 | 9,551,915,100  | 63,679,434 | 9,543,251,564<br>(99.91%)  | 63,646,006<br>(99.95%) | 9,328,710,221<br>(97.75%)  |
| HD-II-1  | 8,870,079,000  | 59,133,860 | 8,723,734,448<br>(98.35%)  | 58,173,248<br>(98.38%) | 8,428,033,398<br>(96.61%)  |
| HD-II-2  | 8,167,272,600  | 54,448,484 | 8,053,196,360<br>(98.60%)  | 53,702,790<br>(98.63%) | 7,819,937,094<br>(97.10%)  |
| HD-II-3  | 8,322,535,500  | 55,483,570 | 8,191,297,670<br>(98.42%)  | 54,621,928<br>(98.45%) | 7,946,620,567<br>(97.01%)  |

Table S7: The differentially expressed genes using for quantitative real-time PCR.

| Gene ID          | RNA-Seq (FPKM Value) |        |        |        | Description                                          |
|------------------|----------------------|--------|--------|--------|------------------------------------------------------|
|                  | JG1-II               | JG2-II | ZJJ-II | HD-II  |                                                      |
| Unigene042048_01 | 0.47                 | 4.09   | 19.81  | 31.6   | hypothetical protein L484_018886                     |
| Unigene001412_01 | 21.72                | 174.91 | 601.01 | 745.81 | PREDICTED: 17.9 kDa class II heat shock protein-like |
| Unigene004190_01 | 2.89                 | 169.20 | 37.09  | 92.12  | Calcium-binding protein CML38                        |
| Unigene005022_01 | 10.33                | 82.88  | 410.90 | 117.40 | PREDICTED: aquaporin TIP1-1-like                     |
| Unigene010575_01 | 2.47                 | 55.55  | 165.39 | 228.90 | PREDICTED: uncharacterized protein LOC103954024      |
| Unigene005530_01 | 9.89                 | 230.03 | 485.78 | 80.94  | Chlorophyll a-b binding protein 151                  |
| Unigene033992_01 | 0.41                 | 22.15  | 22.13  | 28.11  | Sphingoid base hydroxylase 2                         |

|                      |             |        |        |       |                                                                   |
|----------------------|-------------|--------|--------|-------|-------------------------------------------------------------------|
| Unigene004<br>215_02 | 1326.5<br>2 | 0      | 0.66   | 3.93  | PREDICTED: protein<br>CHROMATIN REMODELING<br>35-like isoform X3  |
| Unigene016<br>354_01 | 92.18       | 0.04   | 18.21  | 0.65  | Mlo-related protein                                               |
| Unigene025<br>939_01 | 287.47      | 0      | 0.14   | 0.03  | PREDICTED:<br>dormancy-associated protein<br>homolog 3            |
| Unigene010<br>179_01 | 55.89       | 0.10   | 0      | 0     | Omega-6 fatty acid desaturase,<br>endoplasmic reticulum isozyme 2 |
| Unigene024<br>393_01 | 1.58        | 3.00   | 12.10  | 19.19 | Peroxisomal membrane protein                                      |
| Unigene006<br>965_01 | 139.19      | 93.39  | 11.03  | 0.11  | PREDICTED: F-box protein<br>GID2-like                             |
| Unigene005<br>553_01 | 579.41      | 864.09 | 111.48 | 38.67 | hypothetical protein<br>L484_027077                               |

Table S8: Genes related to apomeiosis in “reproductive process” and “reproduction” terms.

| Gene ID              | RNA-Seq (FPKM<br>Value) |            |            |           | Description                                              | GO Term                                                          |
|----------------------|-------------------------|------------|------------|-----------|----------------------------------------------------------|------------------------------------------------------------------|
|                      | JG1<br>-II              | JG2<br>-II | ZJJ<br>-II | HD<br>-II |                                                          |                                                                  |
| Up-regulat<br>ed     |                         |            |            |           |                                                          |                                                                  |
| Unigene00<br>4443_01 | 0                       | 4.97       | 12.<br>57  | 8.2<br>8  | Myb family<br>transcription factor<br>APL                | GO:0009566//fertiliz<br>ation                                    |
| Unigene00<br>4656_01 | 0                       | 20.6<br>1  | 19.<br>74  | 8.1<br>8  | uncharacterized<br>protein<br>LOC100265927               | GO:0022414//reprod<br>uctive process                             |
| Unigene00<br>6134_02 | 0                       | 5.95       | 10.<br>52  | 13.<br>64 | structural<br>maintenance of<br>chromosomes<br>protein 3 | GO:0051301//cell<br>division                                     |
| Unigene00<br>7852_01 | 0                       | 23.2<br>5  | 66.<br>42  | 28.<br>05 | splicing factor U2af<br>small subunit B                  | GO:0048573//photop<br>eriodism, flowering                        |
| Unigene01<br>1378_01 | 0                       | 2.94       | 1.6<br>1   | 2.8<br>4  | hypothetical protein<br>L484_025226                      | GO:0009825//multidi<br>mensional cell<br>growth                  |
| Unigene01<br>4383_01 | 0                       | 10.2<br>8  | 7.5<br>9   | 8.1<br>4  | Zinc finger protein<br>MAGPIE                            | GO:0008356//asymm<br>etric cell division                         |
| Unigene01<br>9135_01 | 0                       | 7.71       | 2.7<br>2   | 9.8<br>1  | Pyruvate kinase<br>isozyme A                             | GO:0048609//multic<br>ellular organismal<br>reproductive process |

|                      |           |           |           |           |                                                    |                                                                  |
|----------------------|-----------|-----------|-----------|-----------|----------------------------------------------------|------------------------------------------------------------------|
| Unigene02<br>2271_01 | 0         | 16.9<br>9 | 13.<br>32 | 14.<br>29 | mitogen activated<br>protein kinase                | GO:0010229//inflore<br>scence development                        |
| Unigene03<br>3127_01 | 0         | 5.63      | 8.8<br>1  | 7.3<br>3  | Serine/threonine-pro<br>tein kinase<br>TOUSLED     | GO:0051301//cell<br>division                                     |
| Unigene03<br>4760_01 | 0         | 0.27      | 1.0<br>6  | 5.1<br>1  | Protein GRIP                                       | GO:1903046//meioti<br>c cell cycle process                       |
| Unigene03<br>8297_01 | 0         | 23.6<br>6 | 18.<br>66 | 4.1<br>0  | putative<br>nucleoredoxin 1                        | GO:0009860//pollen<br>tube growth                                |
| Unigene02<br>3755_01 | 0.0<br>6  | 8.91      | 16.<br>25 | 21.<br>72 | Receptor-like<br>protein kinase<br>FERONIA         | GO:0030308//negativ<br>e regulation of cell<br>growth            |
| Unigene04<br>5567_01 | 0         | 2.12      | 9.3<br>9  | 0.7<br>6  | Floral homeotic<br>protein APETALA 2               | GO:0030154//cell<br>differentiation                              |
| Down-regu<br>lated   |           |           |           |           |                                                    |                                                                  |
| Unigene00<br>6953_01 | 24.<br>55 | 0         | 0         | 0         | 11S globulin<br>precursor isoform<br>1B            | GO:0048609//multic<br>ellular organismal<br>reproductive process |
| Unigene01<br>1564_01 | 20.<br>37 | 0         | 0         | 0         | CCG-binding<br>protein 1                           | GO:0022414//reprod<br>uctive process                             |
| Unigene01<br>9776_02 | 33.<br>65 | 0.49      | 0.4<br>3  | 0.0<br>4  | hypothetical protein<br>L484_021422                | GO:0022414//reprod<br>uctive process                             |
| Unigene02<br>1325_01 | 30.<br>57 | 0.03      | 0.1<br>1  | 0         | oxysterol-binding<br>protein-related<br>protein 3A | GO:0009566//fertiliz<br>ation                                    |
| Unigene02<br>1971_01 | 8.9<br>7  | 0         | 0         | 0         | WD<br>repeat-containing<br>protein LWD1-like       | GO:0048573//photop<br>eriodism, flowering                        |
| Unigene02<br>8099_01 | 11.<br>59 | 0         | 0         | 0         | 11S globulin<br>precursor isoform<br>1B            | GO:0048609//multic<br>ellular organismal<br>reproductive process |
| Unigene02<br>8918_01 | 4.2<br>4  | 0         | 0         | 0         | 11S globulin<br>precursor isoform<br>1B            | GO:0048609//multic<br>ellular organismal<br>reproductive process |
| Unigene02<br>9815_01 | 41.<br>66 | 0         | 0         | 0         | putative<br>nucleoredoxin 1                        | GO:0009860//pollen<br>tube growth                                |
| Unigene03<br>0946_01 | 4.1<br>4  | 0         | 0         | 0         | 11S globulin<br>precursor isoform<br>1B            | GO:0048609//multic<br>ellular organismal<br>reproductive process |
| Unigene03<br>4776_01 | 31.<br>34 | 0.10      | 0         | 0         | 11S globulin<br>precursor isoform<br>1B            | GO:0048609//multic<br>ellular organismal<br>reproductive process |
| Unigene03            | 1.9       | 0         | 0         | 0         | receptor-like protein                              | GO:0030308//negativ                                              |

|                  |       |      |   |      |                                   |                                                           |
|------------------|-------|------|---|------|-----------------------------------|-----------------------------------------------------------|
| 6981_01          | 3     |      |   |      | kinase FERONIA                    | e regulation of cell growth                               |
| Unigene037390_01 | 2.61  | 0    | 0 | 0    | 11S globulin precursor isoform 1B | GO:0048609//multicellular organismal reproductive process |
| Unigene040071_01 | 13.92 | 1.90 | 0 | 0.59 | hypothetical protein L484_010548  | GO:0048573//photoperiodism, flowering                     |

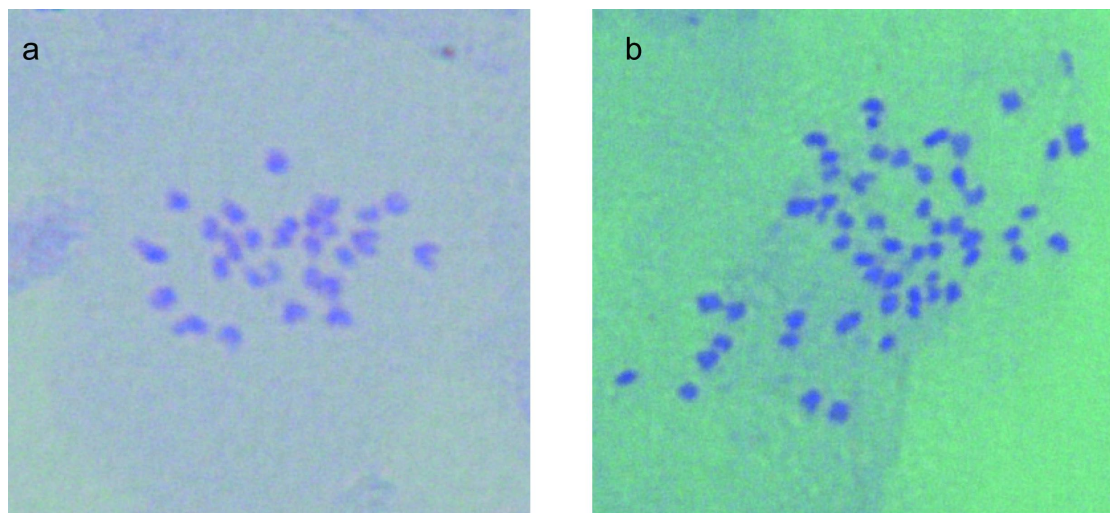

Figure S1: Microphotographs showing root tip cells of *B. tricuspis* cytotypes at metaphase: (a) Chromosome figures of JG2 ( $2n=28$ ). (b) Chromosome figures of HD ( $2n=56$ ).



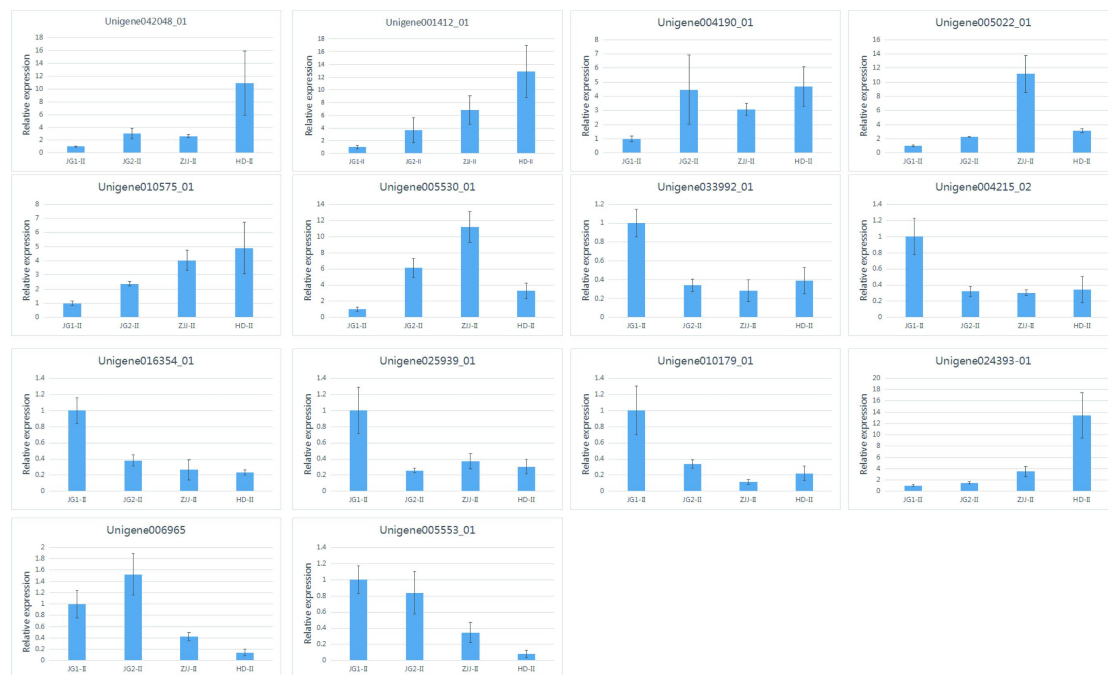

Figure S3: Quantitative real-time PCR results for differentially expressed genes.

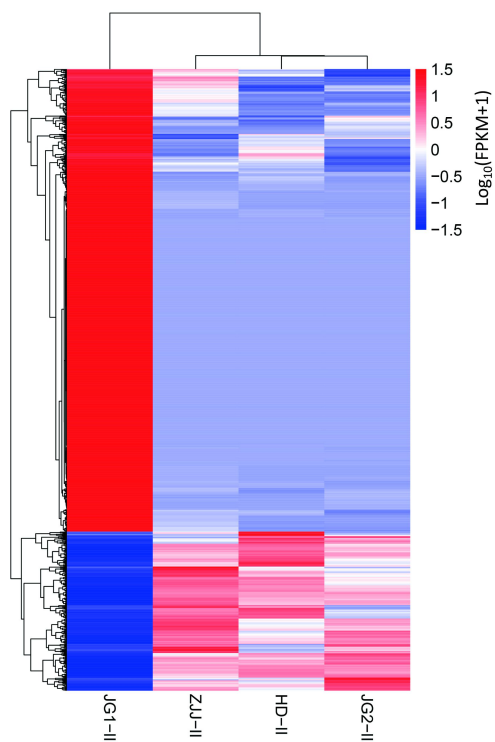

Figure S4: Clustering analysis of differentially expressed genes related to apomeiosis.



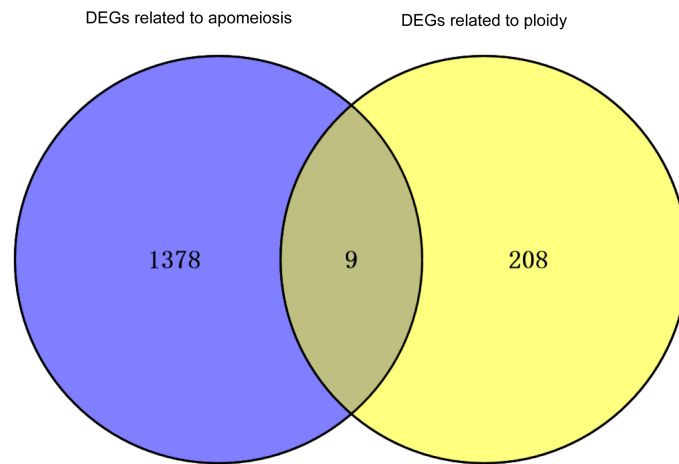

Figure S5: Venn diagrams showing nine genes associated with both apomixis and ploidy.
